# Supplementary material for: Improved CO2/CH4 Separation Properties of Cellulose Triacetate Mixed–Matrix Membranes with CeO2@GO Hybrid Fillers
Source: MDPI journal article supplement (doi:10.3390/membranes11100777), 2021-10-11
Supplement: s1 [file s1]

Supporting Information

# Supplementary Materials: Improved CO<sub>2</sub>/CH<sub>4</sub> Separation Properties of Cellulose Triacetate Mixed–Matrix Membranes with CeO<sub>2</sub>@GO Hybrid Fillers

Chhabilal Regmi <sup>1,\*</sup>, Saeed Ashtiani <sup>1</sup>, Zdeněk Sofer <sup>2</sup> and Karel Friess <sup>1,\*</sup>

<sup>1</sup> Department of Physical Chemistry, University of Chemistry and Technology, Technická 5, 16628 Prague, Czech Republic; jamalias@vscht.cz

<sup>2</sup> Department of Inorganic Chemistry, University of Chemistry and Technology, Technická 5, 16628 Prague, Czech Republic; zdenek.sofer@vscht.cz

\* Correspondence: regmic@vscht.cz; friessk@vscht.cz (C.R.); friessk@vscht.cz (K.F.)

## Results

### Methodology of GO synthesis

Synthesis of GO was based on the modified Hummers' method. The details of the synthesis process were explained elsewhere [1]. 10.32 g of graphite and 5.2 g sodium nitrate were mixed into 250 mL 1 M HCl with constant stirring. The temperature of the mixture was maintained to 0 °C by using an ice bath. 32 g of KMnO<sub>4</sub> (Sigma-Aldrich, Czech Republic) was added to the mixture and continued stirring for 2 h. The temperature of the mixture was increased to room temperature and stirred for 4 h, followed by heating to 35 °C for 30 min. 250 mL of deionized (DI) water was added to the mixture and heated to 70 °C for 15 minutes. The mixture was then mixed with 1 L DI water. The excess MnO<sub>2</sub>/KMnO<sub>4</sub> were removed by the addition of the 3% H<sub>2</sub>O<sub>2</sub>. GO was further washed by DI water and finally dried at 50 °C in a vacuum oven for 48 h.

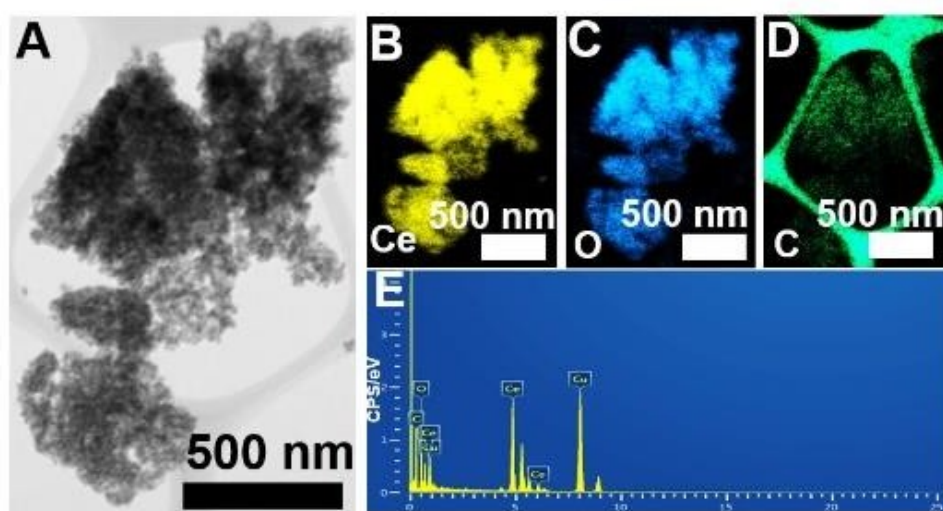

**Figure S1.** EDS mapping of hybrid matrix confirming the presence of CeO<sub>2</sub>@GO.

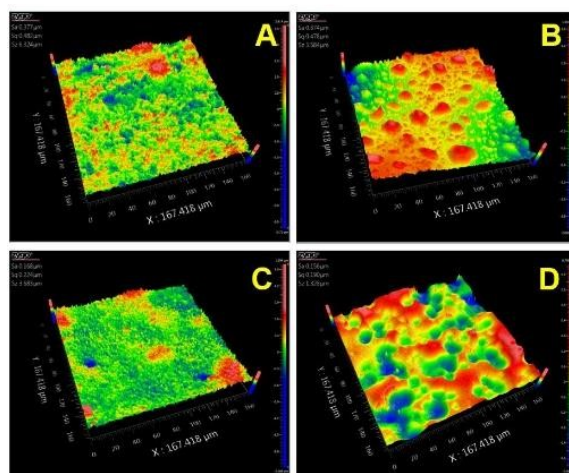

**Figure S2.** Surface roughness measurement of the synthesized membranes via 3D non-contact optical surface profiler; A) CTCeGO3, B) CTCeGO5, C) CTCeGO7, and D) CTCeGO10.

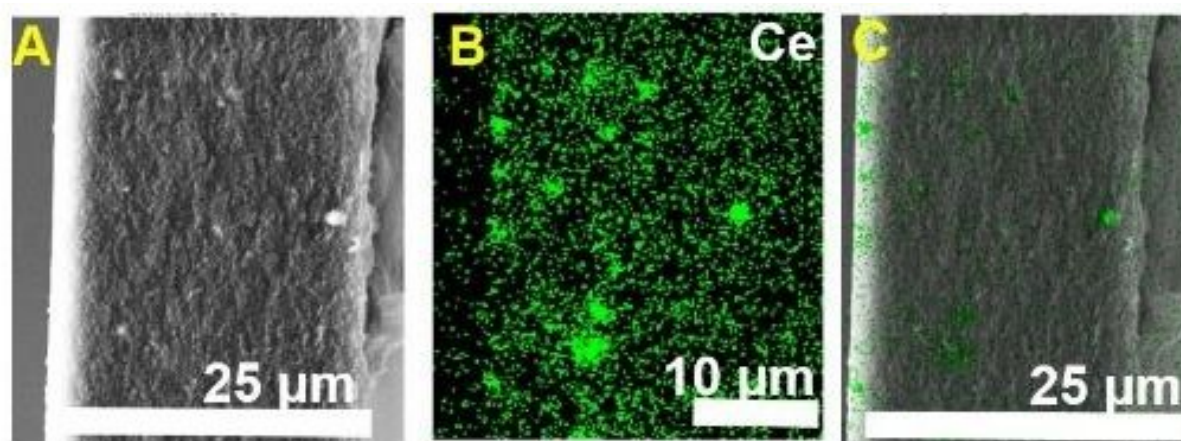

**Figure S3.** EDS mapping of Ce throughout the cross-section in CTCeGO7 MMMs.

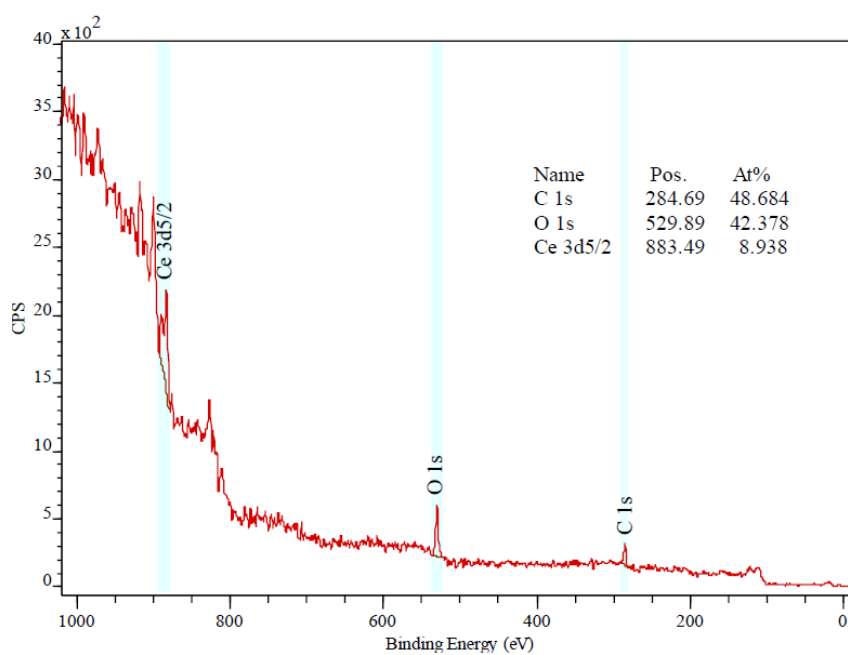

**Figure S4.** XPS survey spectrum of CeO<sub>2</sub>@GO composite.

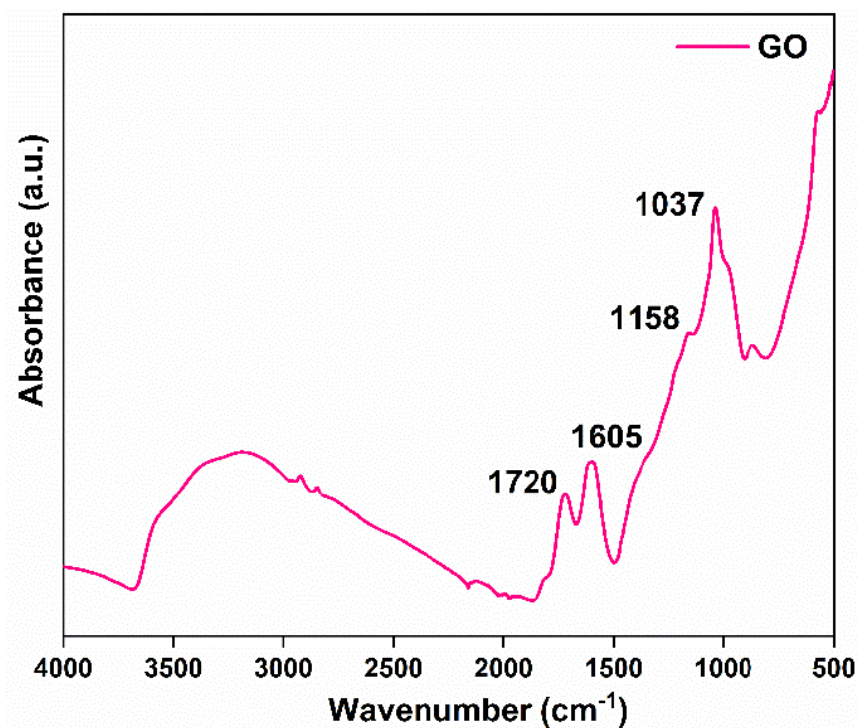

Figure S5. FTIR spectra of a pristine GO.

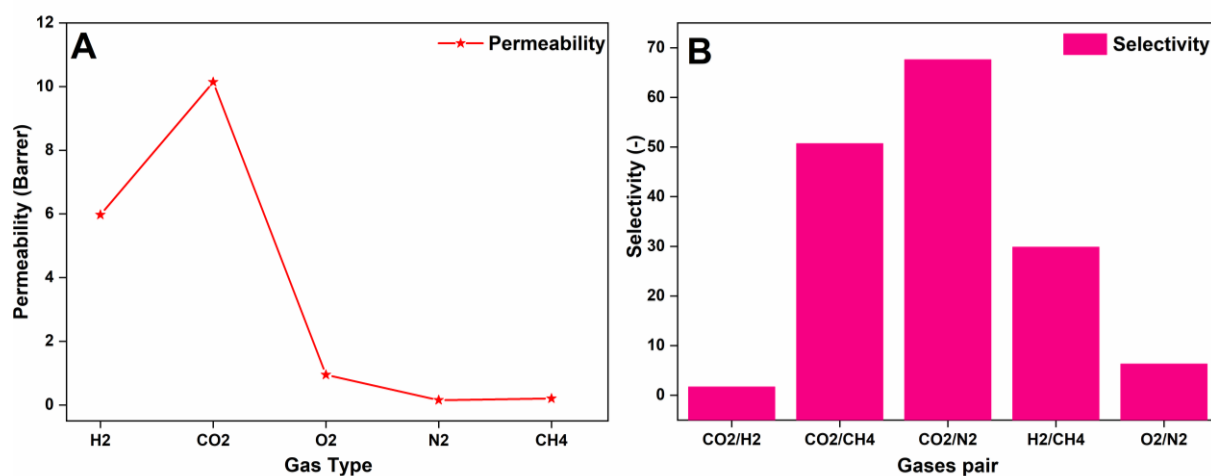

Figure S6. Permeability and their corresponding selectivity of different gases pair in CTCeGO7 MMMs.

Table S1. Arithmetic mean height, root mean square height and a maximum height of the synthesized membrane determined by the 3D optical non-contact profiler.

| #        | Arithmetic mean height<br>(Sa)( $\mu\text{m}$ ) | Root mean square height<br>(Sq) ( $\mu\text{m}$ ) | Maximum height<br>(Sz) ( $\mu\text{m}$ ) |
|----------|-------------------------------------------------|---------------------------------------------------|------------------------------------------|
| CTCeGO3  | 0.377                                           | 0.482                                             | 6.324                                    |
| CTCeGO5  | 0.374                                           | 0.478                                             | 3.584                                    |
| CTCeGO7  | 0.168                                           | 0.224                                             | 3.683                                    |
| CTCeGO10 | 0.156                                           | 0.190                                             | 1.328                                    |

Table S2. Langmuir sorption isotherm fitting parameters for CO<sub>2</sub> sorption in the CTA- CeO<sub>2</sub>@GO membrane matrix.

---

| #        | C <sub>e</sub> | K <sub>L</sub> | R <sup>2</sup> |
|----------|----------------|----------------|----------------|
| CTCeGO3  | 1132.28        | 0.03           | 0.997          |
| CTCEGO5  | 141.96         | 0.39           | 0.997          |
| CTCeGO7  | 122.78         | 0.53           | 0.997          |
| CTCeGO10 | 97.59          | 0.91           | 0.996          |

## References

1. S. Ashtiani, M. Khoshnamvand, A. Shaliutina-Kolešová, D. Bouša, Z. Sofer, K. Friess, Co<sub>0.5</sub>Ni<sub>0.5</sub>FeCrO<sub>4</sub> spinel nanoparticles decorated with UiO-66-based metal-organic frameworks grafted onto GO and O-SWCNT for gas adsorption and water purification, *Chemosphere*, 255 (2020) 126966.
